# Supplementary material for: Different coastal marsh sites reflect similar topographic conditions for bare patches and vegetation recovery
Source: Copernicus journal article supplement (doi:10.5194/esurf-2020-56), 2020-06-30
Supplement: Supplementary file 1 [file esurf-2020-56-supplement.pdf]

Supplement of

Different Coastal Marsh Sites Reflect Similar Topographic Conditions for Bare Patches and Vegetation Recovery

**Chen Wang<sup>1,2</sup>, Lennert Schepers<sup>2</sup>, Matthew L. Kirwan<sup>3</sup>, Enrica Belluco<sup>4</sup>, Andrea D'Alpaos<sup>5</sup>, Qiao Wang<sup>6,1</sup>, Shoujing Yin<sup>1</sup>, and Stijn Temmerman<sup>2</sup>**

### **Contents of this file**

Figure S1 – S3

### **Introduction**

This supporting information provides the LIDAR data for the three sites. These data were acquired and processed as described in the 'Materials and data preprocessing' section of the paper.

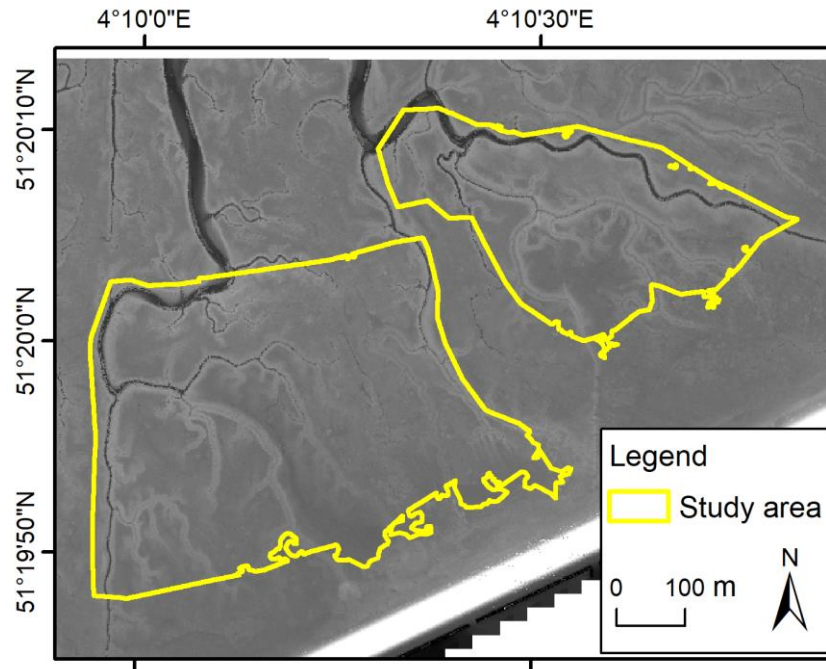

Figure S1. LIDAR data for Saeftinghe.

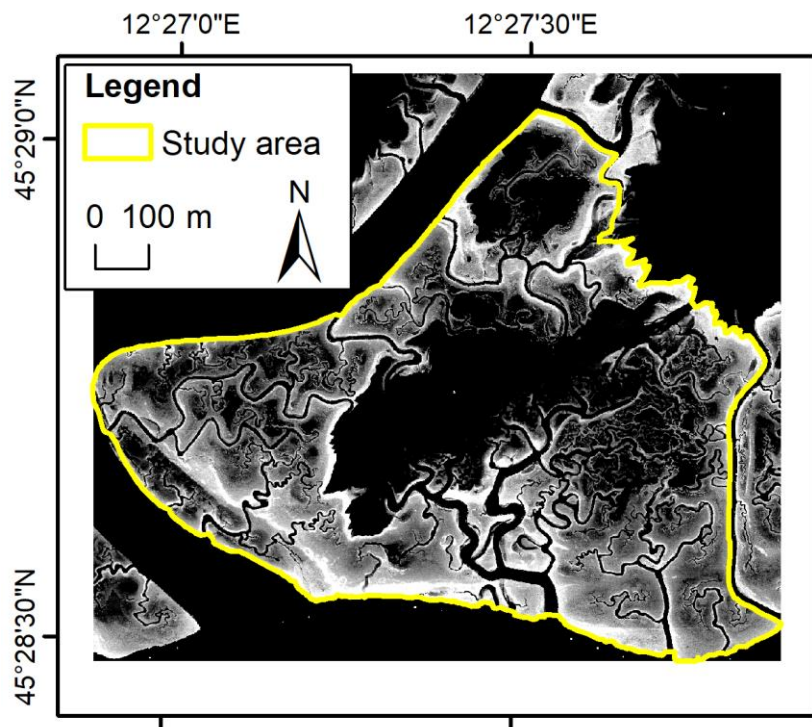

Figure S2. LIDAR data for San Felice.

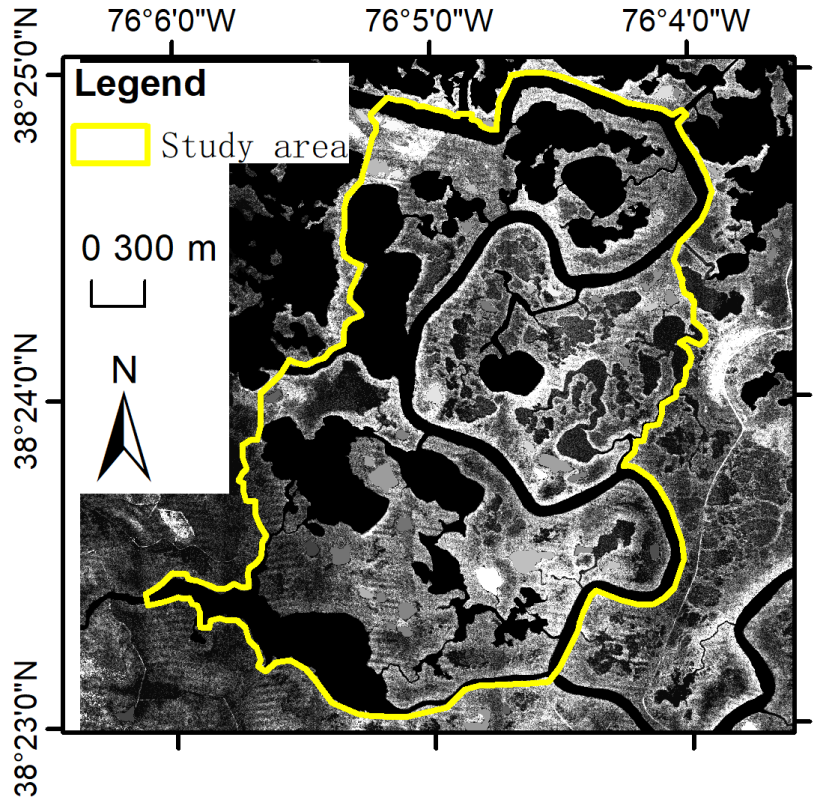

Figure S3. LIDAR data for Blackwater.
