# Supplementary material for: Different coastal marsh sites reflect similar topographic conditions for bare patches and vegetation recovery
Source: Copernicus journal article supplement (doi:10.5194/esurf-2020-56), 2020-06-30
Supplement: Supplementary file [file esurf-2020-56-AC1-supplement.zip]

Supplement of

~~Different Coastal Marsh Sites Reflect Similar Topographic Conditions for Bare Patches and Vegetation Recovery~~  
Different coastal marsh sites reflect similar topographic conditions under which bare patches and vegetation recovery occurs

Chen Wang<sup>1,2</sup>, Lennert Schepers<sup>2</sup>, Matthew L. Kirwan<sup>3</sup>, Enrica Belluco<sup>4</sup>, Andrea D'Alpaos<sup>5</sup>, Qiao Wang<sup>6,1</sup>, Shoujing Yin<sup>1</sup>, and Stijn Temmerman<sup>2</sup>

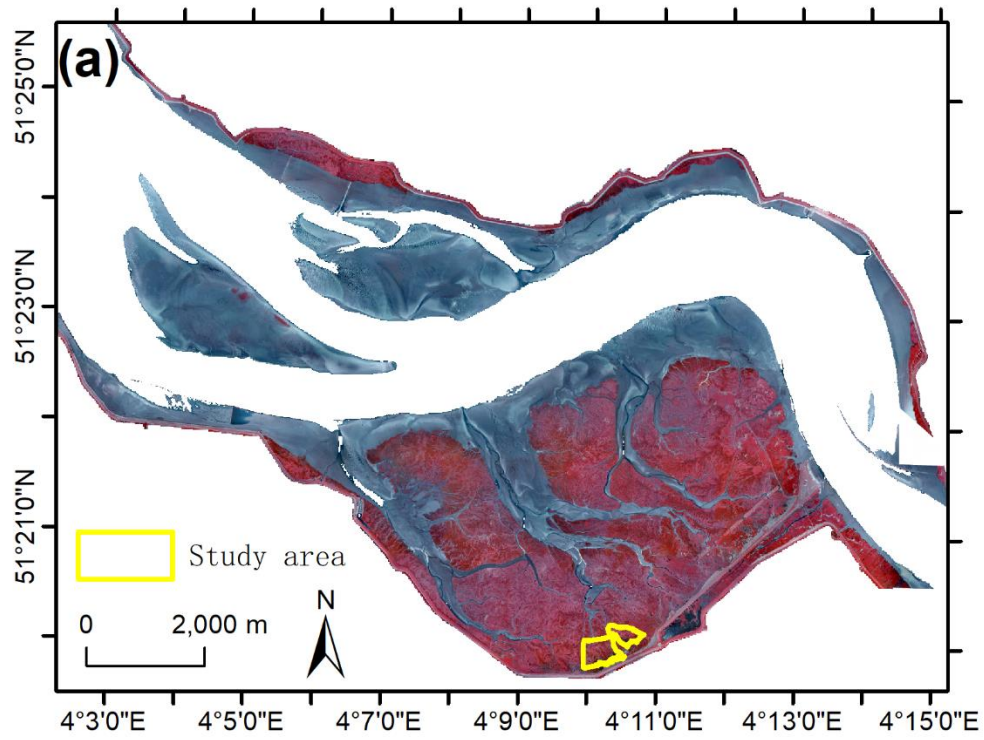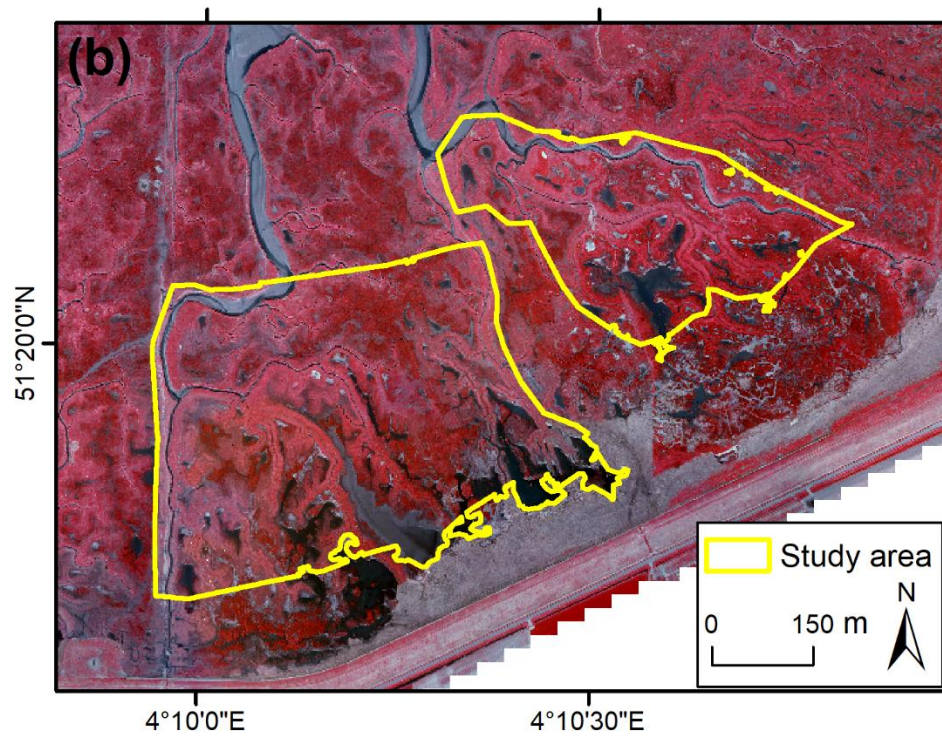

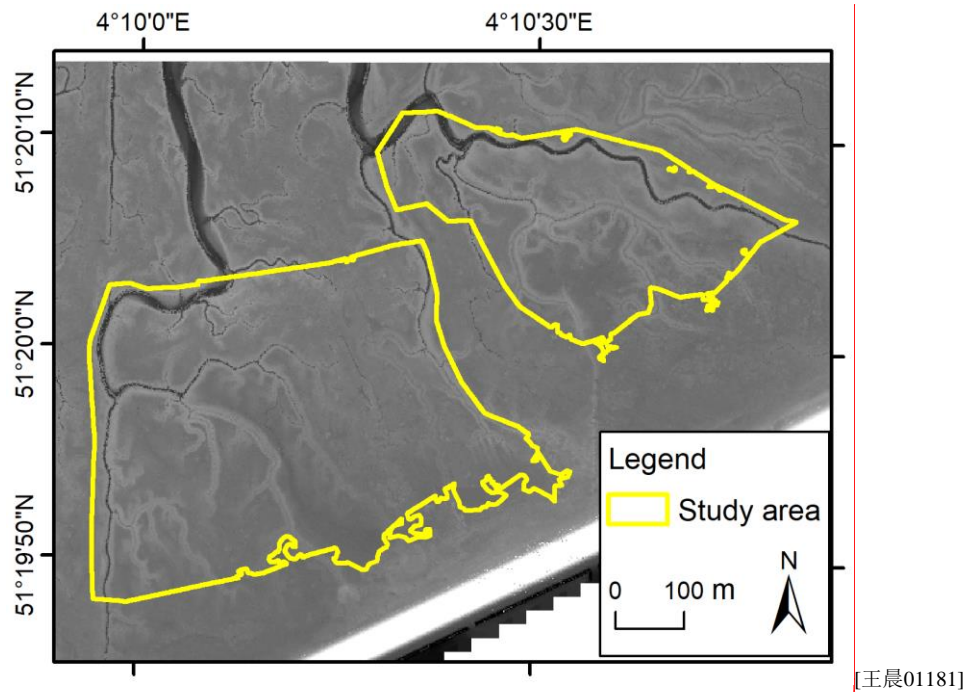

Figure S1. False-color aerial photograph of 2004 LIDAR data for the study area in the Saeftinghe marsh.



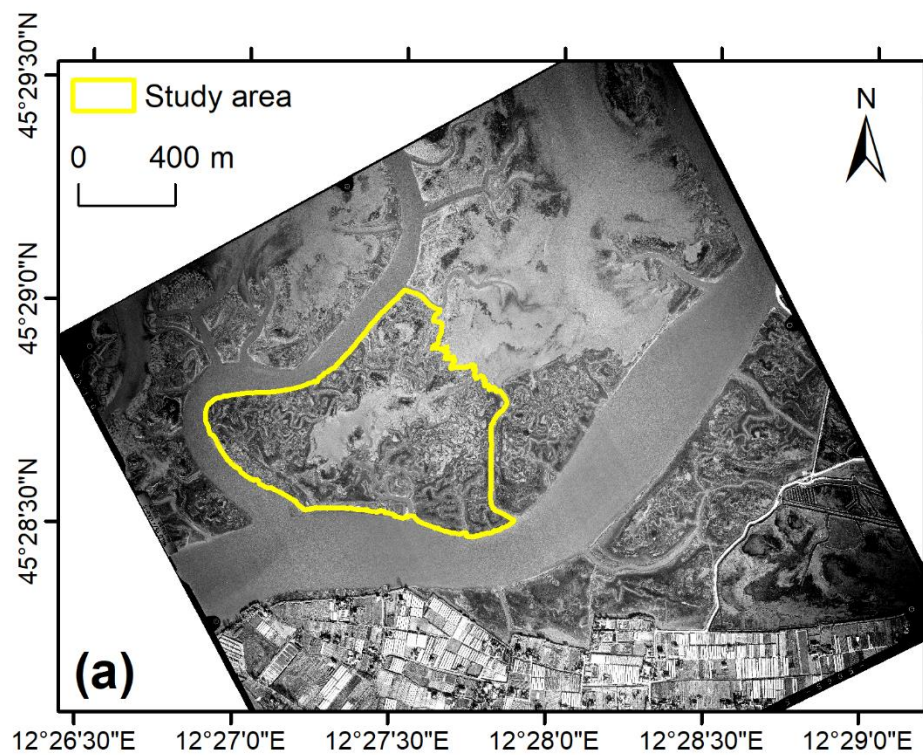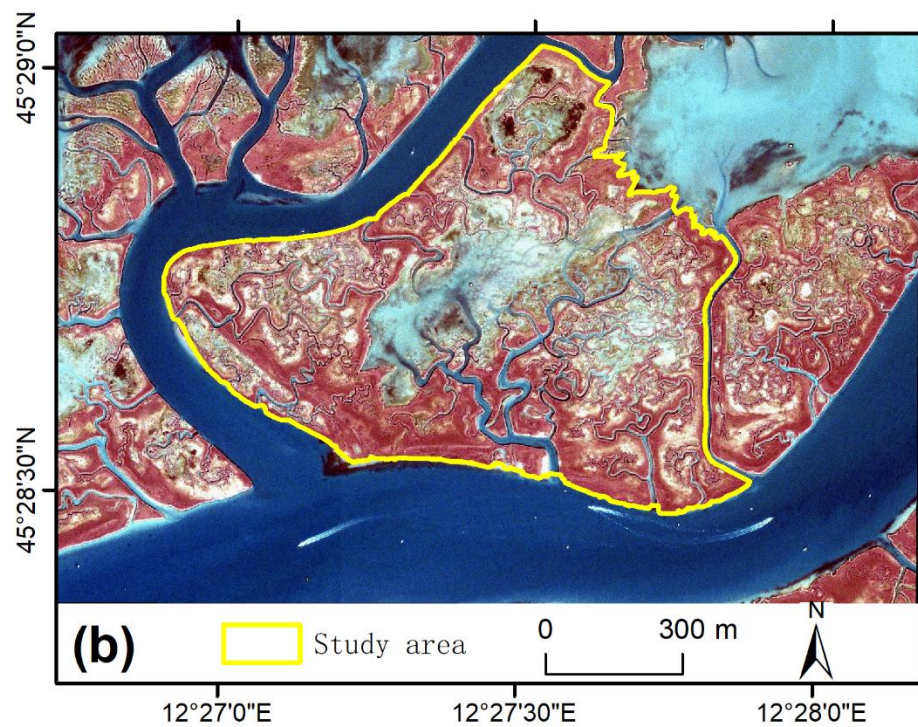

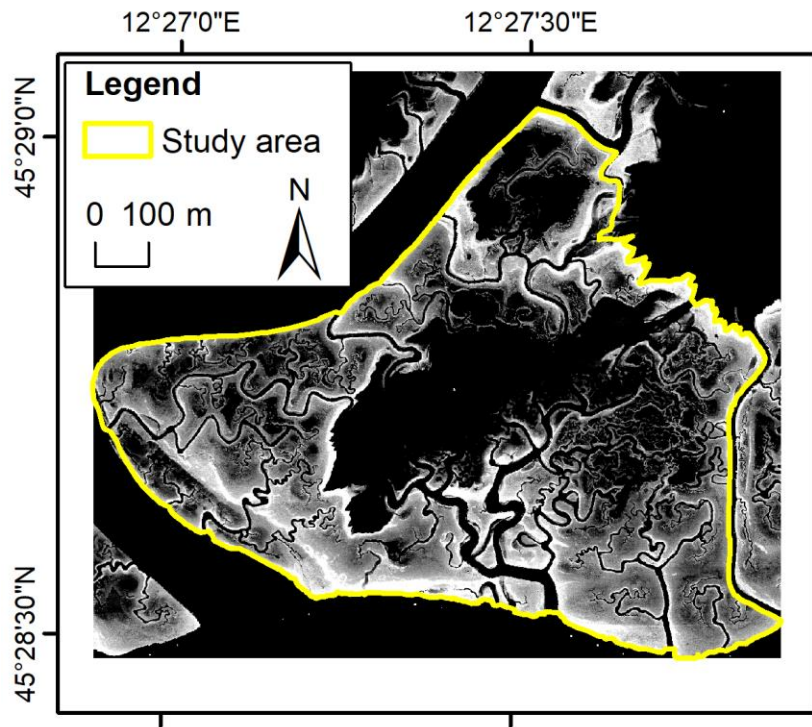

Figure S2. [Aerial photograph acquired in 2000 showing the surrounding landscape \(a\)](#) and [IKONOS image of 2006 \(b\)](#) ~~LIDAR data~~ for [the study area in the San Felice marsh, San Felice](#).



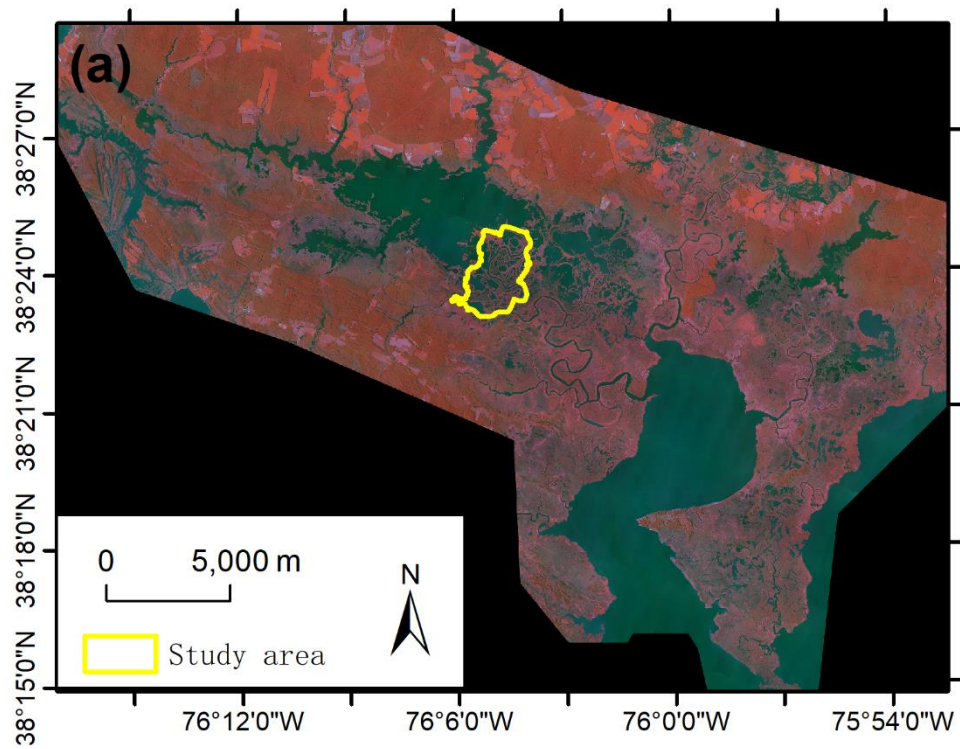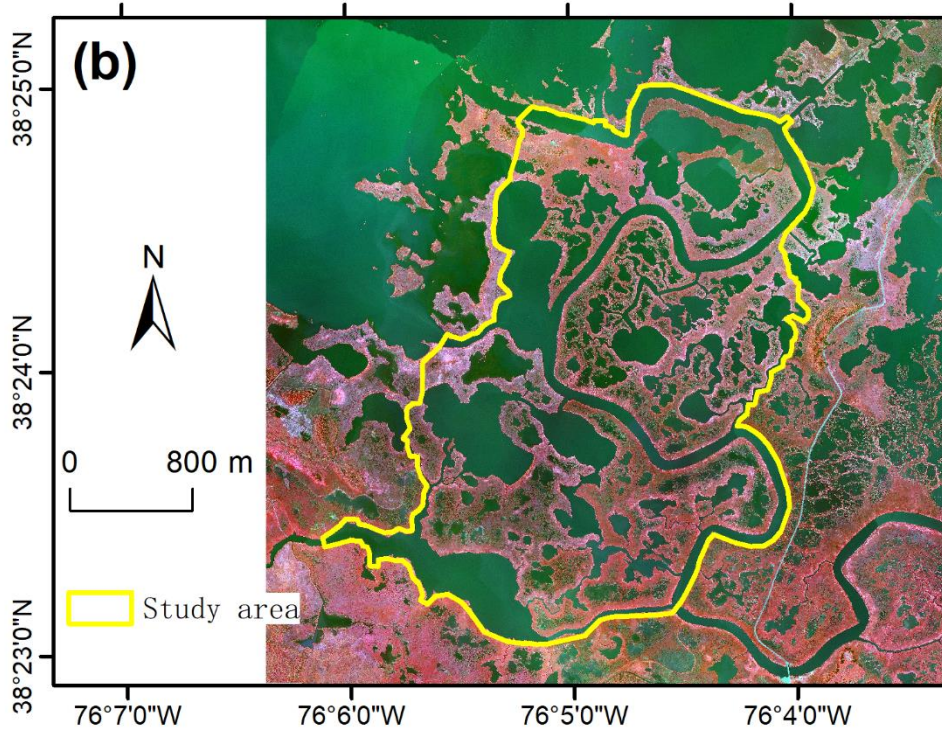

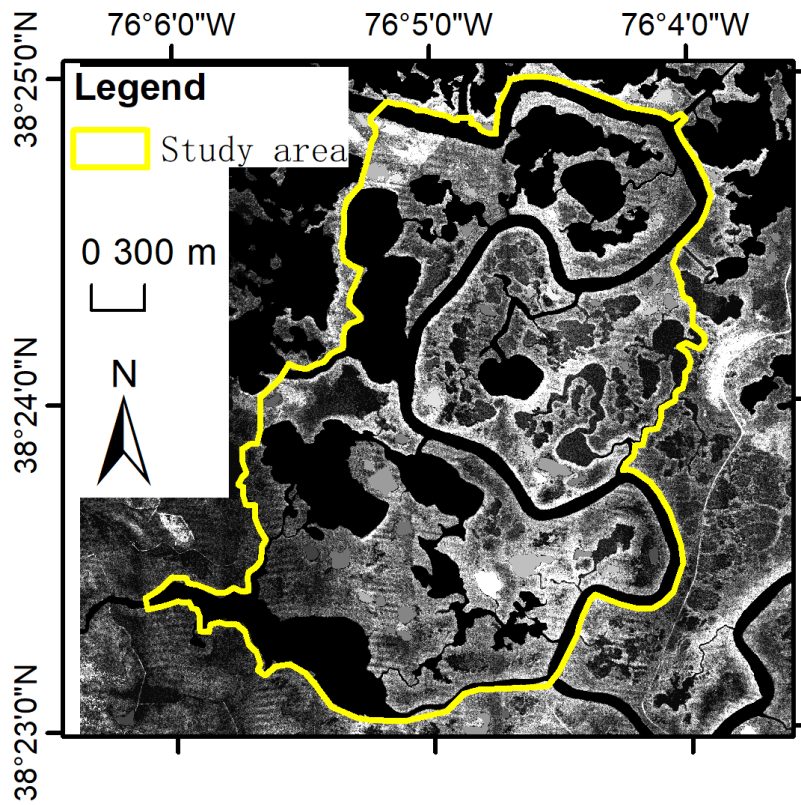

Figure S3. [False-color Aerial photograph of 2010 LIDAR data](#) for [the study area in the Blackwater Marshes](#). [Blackwater](#).

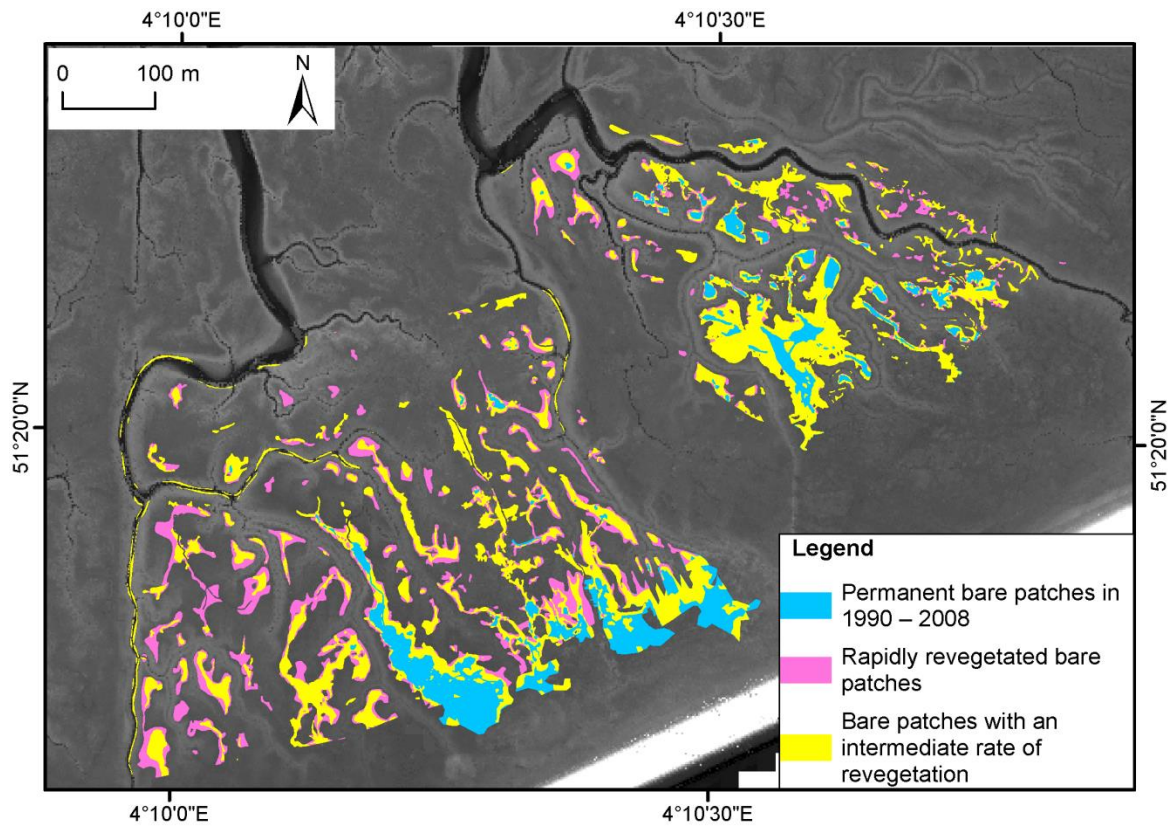

Figure S4: Spatial distribution of bare patches with a different rate of revegetation in the period of 1990–2008 in Saeftinghe.
